# Supplementary material
Source: Springer Nature journal article supplement (https://www.springermedizin.de/resource/supplementary/12885_2012_3251_MOESM12_ESM.pdf/9463044)

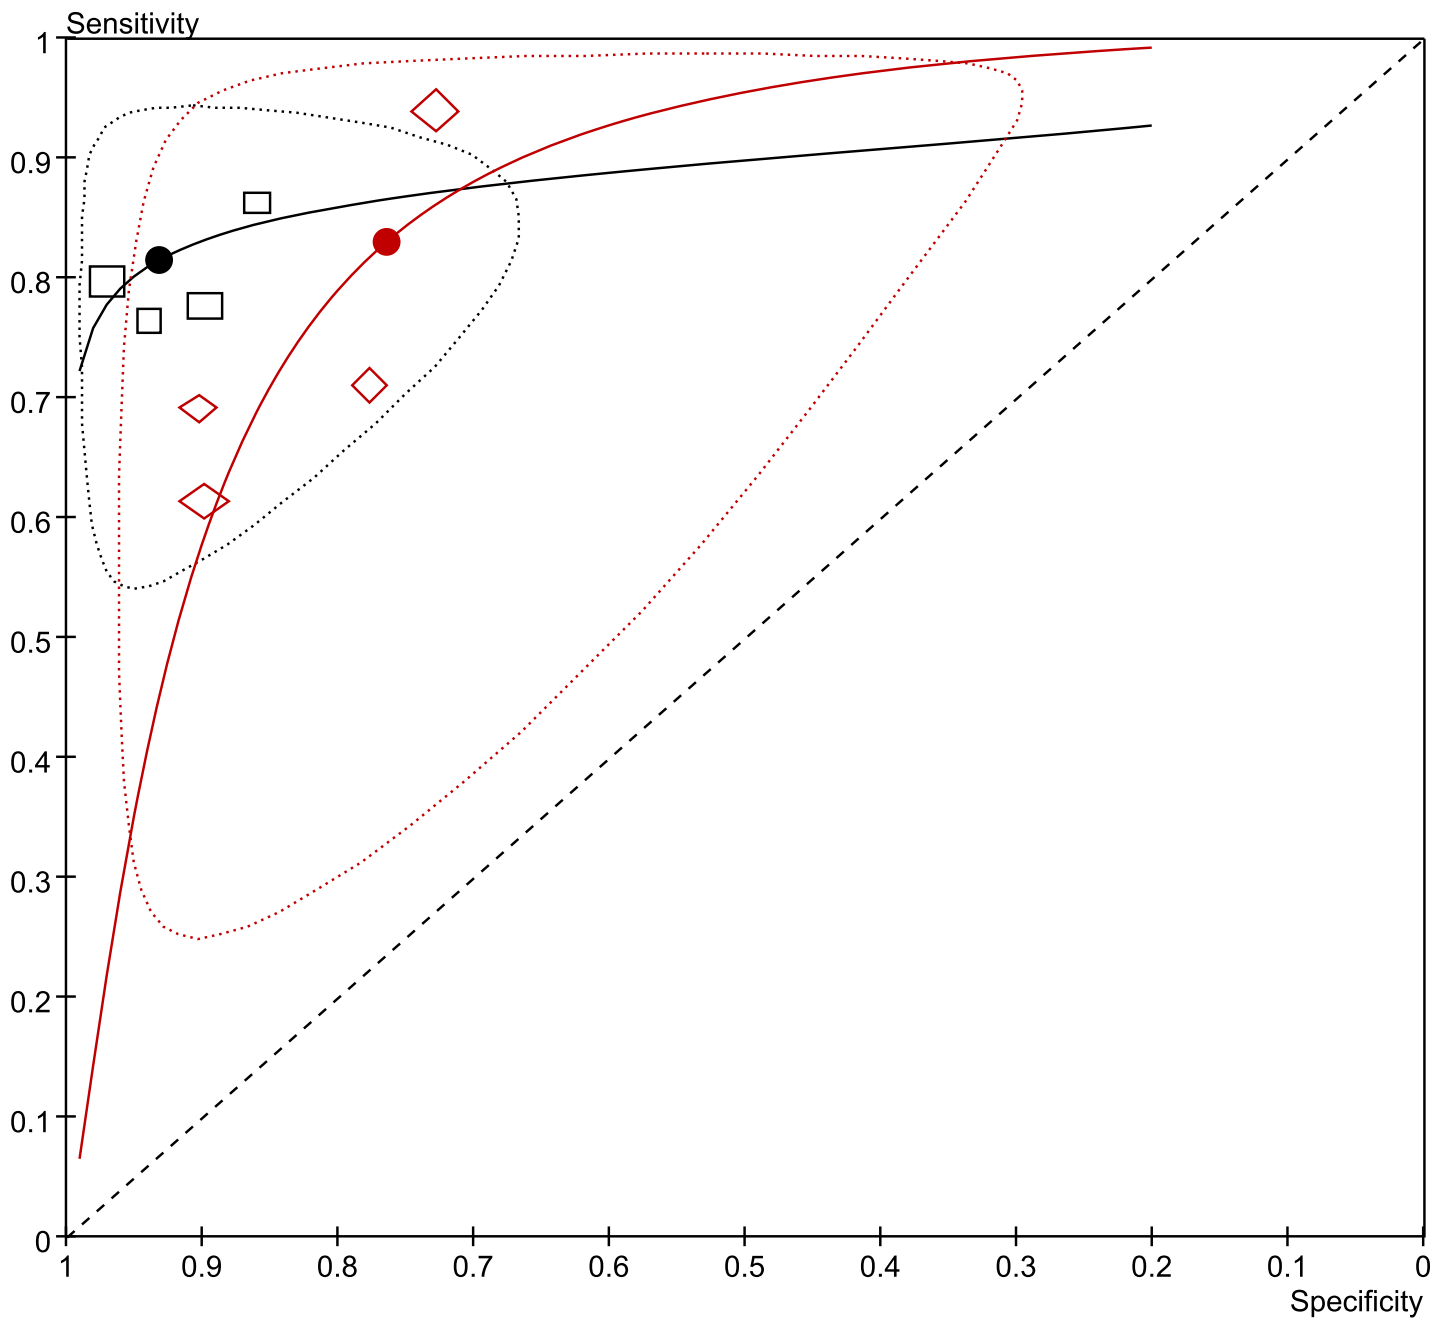

**Legend**  
□ HE4\_EOC      ◇ CA125\_EOC

Supplement: MOESM12 [file 9463044]
